# Supplementary material for: An ultra-thin flexible wearable sensor with multi-response capability prepared from ZIF-67 and conductive metal–organic framework composites for health signal monitoring
Source: Royal Society of Chemistry journal article supplement (doi:10.1039/d2lc00921h), 2022-01-01
Supplement: d2lc00921h1.pdf [file d2lc00921h1.pdf]

## Electronic supplementary information

### **An ultra-thin flexible wearable sensor with multi-response capability prepared from ZIF-67 and conductive metal-organic framework composites for health signal monitoring**

Youwei Zhao<sup>a,b</sup>, Xiang Li<sup>b</sup>, Tian Yuan<sup>a</sup>, Shuhong Huang<sup>a</sup>, Ronghui Jiang<sup>a</sup>, Xuefei Duan<sup>a</sup>,  
Ling Li<sup>\*a</sup>, Xiaoting Li<sup>\*b</sup>, Wenming Zhang<sup>\*a</sup>

<sup>a</sup> *Province-Ministry Co-construction Collaborative Innovation Center of Hebei Photovoltaic Technology, College of Physics Science and Technology, Hebei University, Baoding 071002, China.*

<sup>b</sup> *National & Local Joint Engineering Research Center of Metrology Instrument and system, College of Quality and Technical Supervision, Hebei University, Baoding 071002, China.*

#### **Corresponding Author:**

E-mail: lilinghbu@163.com, lxt@hbu.cn and wmzhanghbu@126.com

## **Materials**

Copper nitrate, cobalt nitrate, zinc nitrate, zinc acetate dihydrate, manganese acetate, thiourea, 2-methyl imidazole methanol, 2,3,6,7,10,11-hexahydroxytriphenylene ( $H_{12}C_{18}O_6$ , HHTP), n-hexaoxane and ethanol purchased at Shanghai Maclean Biochemical Technology Co., Ltd. Silver conductive paint was purchased from Mechanic. Weishan Lake dried lotus leaves and ZnS:Cu were purchased at Nano New Material Technology Co., Ltd. The PDMS was purchased at Gainshine, China. Polyimide-based flexible interdigital electrode was purchased from Rigorous Technology Co., Ltd. HSV900 PVDF binder for electrodes and carbon black were purchased from advanced Materia & Laboratory Equipment. Interdigital gold electrode on polyimide substrate were purchased from interdigital electrode manufacturer.

## **Characterizations and Measurements.**

The SEM (FEI, Nova Nano SEM 450), a transmission electron microscope ((FEI, Tecnai G220), and the Canon camera were used to examine the morphologies of the sensitive material. Field Emission TEM (FE-TEM) was performed on FEI Tecnai G2 F20 at 200 kV. The phase composition and crystal structure of the sensitive material were characterized using D8 ADVANCE (3 kW) XRD and  $CuK\alpha$  irradiation ( $\lambda = 1.5418 \text{ \AA}$ ) radiation  $5^\circ \sim 35^\circ$ , and the scan rate was set to  $1^\circ/\text{min}$ . Sensor current measurements were recorded on an Keithley (2636B) digital multimeter. The bending and pressing test of the flexible electronic sensor were characterized in tension on a universal testing machine (WDW-0.05D Jilin Guanteng Automation Technology Co. Ltd).

**Figure S1** (a)The schematic diagram of zinc sulfide preparation. (b) The fabrication of

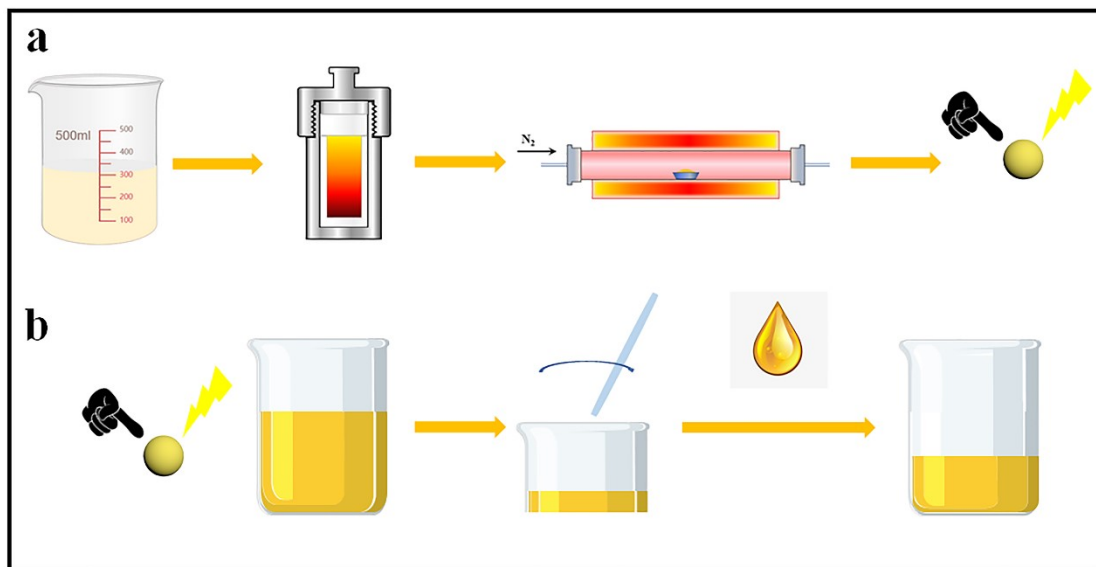

flexible micropatterned PDMS substrates.

**Figure S2** The digital photo of (a) dried lotus leaves, (b) clay, (c) flexible sensor unit. (d) The size of screen-printing electrode. (e)The SEM of micropatterned PDMS film doped with ZnS:Mn. (f) The SEM of micropatterned PDMS film.

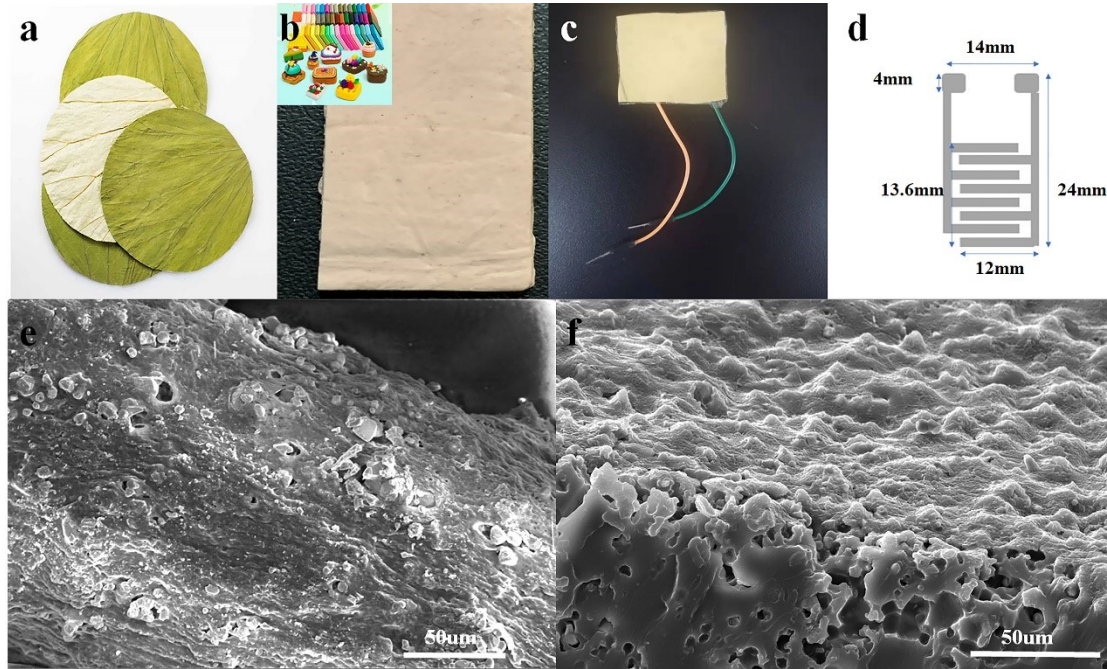

**Figure S3** The digital photos of screen-printing (a) silver electrode, (b) cZIF-67@Cu-CAT electrode on different substrates. (c) The microstructure of cZIF-67@Cu-CAT

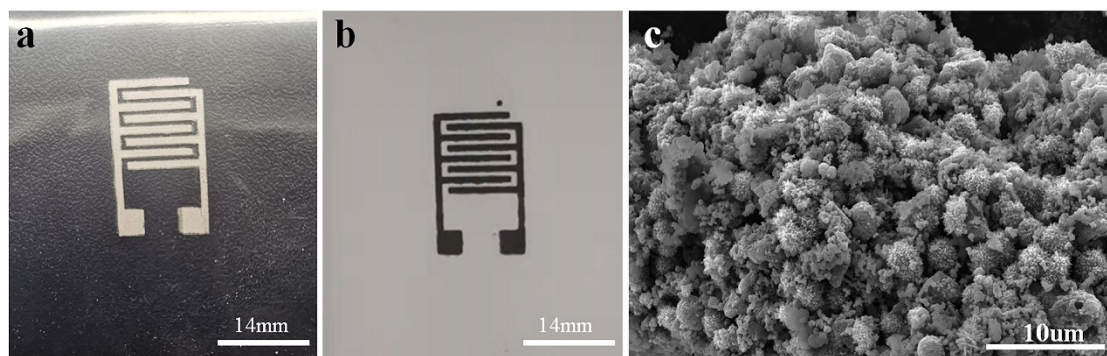

electrode.

**Figure S4** The XRD of (a) ZIF-67, (b) cZIF-67, (c) ZnS prepared by hydrothermal method, (d) ZnS:Mn prepared in the laboratory.

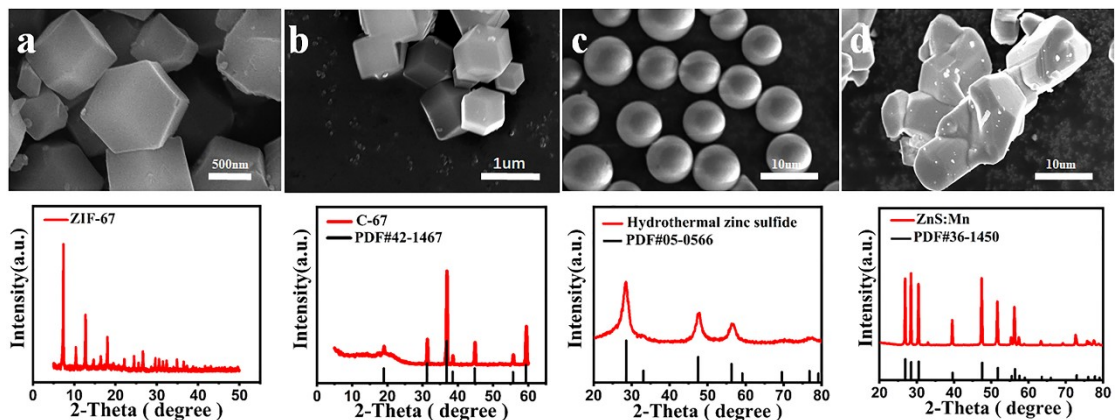

Figure S5 (a) The survey spectrum of cZIF-67@Cu-CAT.

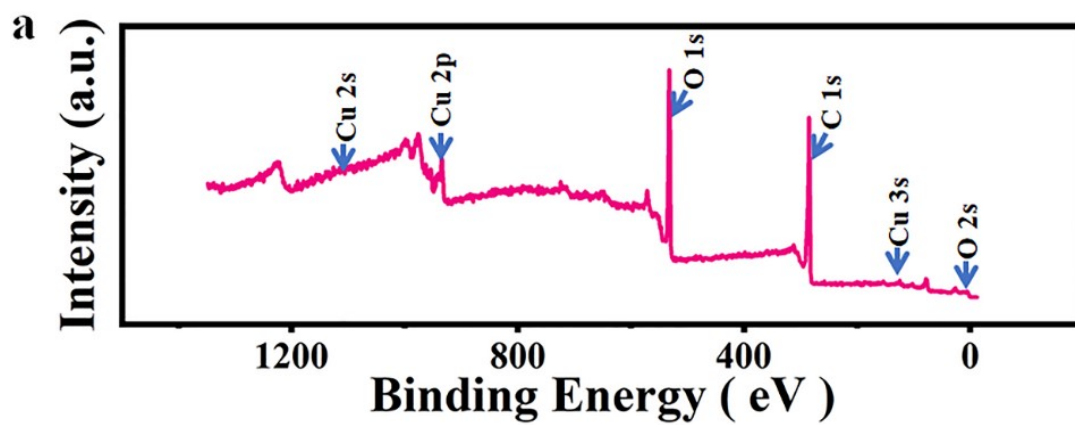

**Figure S6** (a) The Energy dispersive spectroscopy (EDS) of cZIF67@Cu-CAT. (b) The

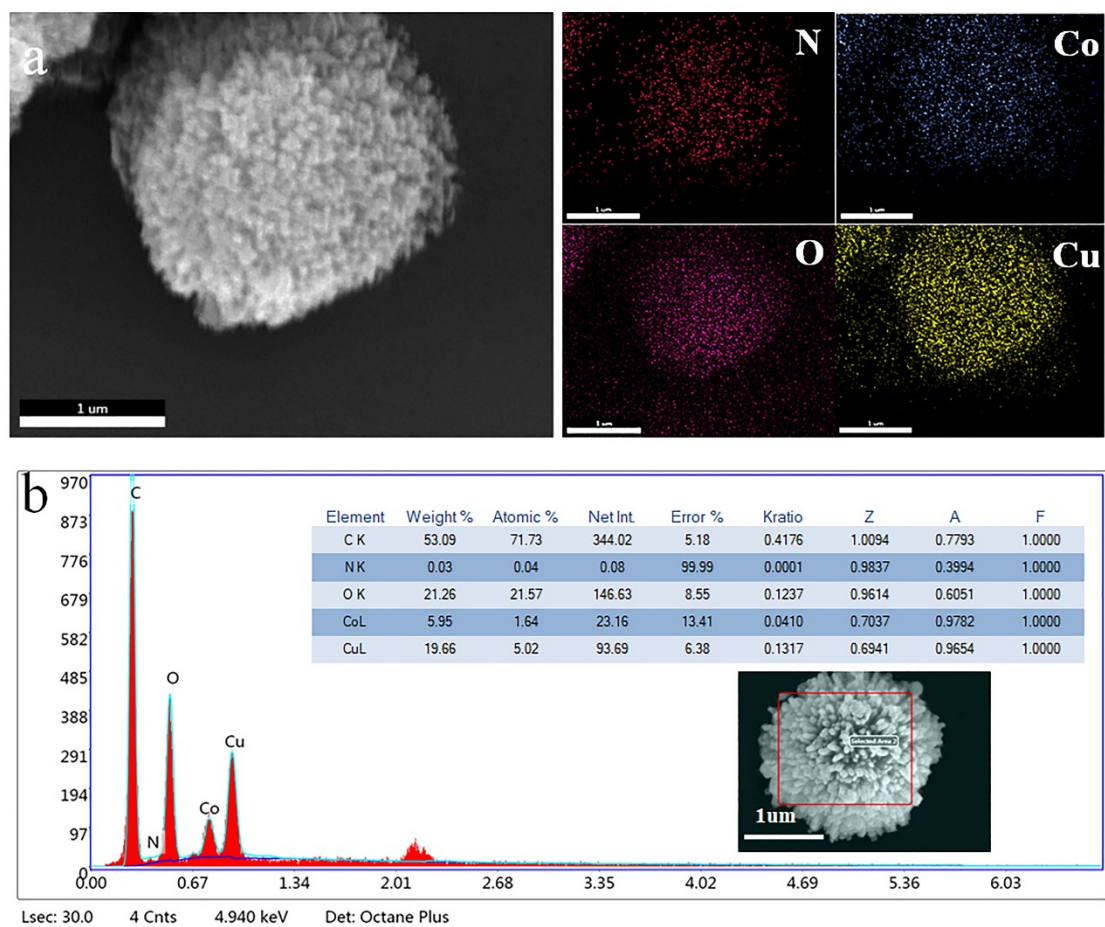

element content of N, O, Cu, Co.



**Figure S7** (a) The TEM images of cZIF-67@Cu-CAT. (b) The image of the as prepared

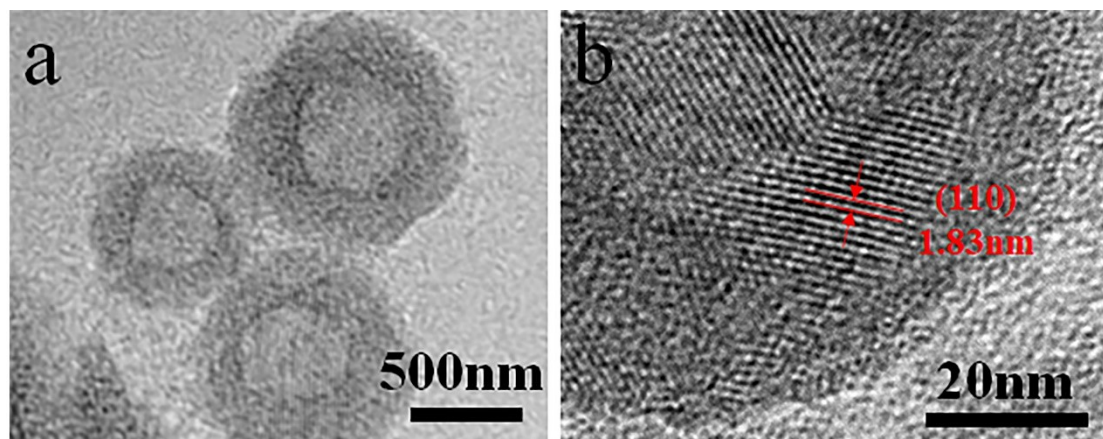

cZIF-67@Cu-CAT.

**Figure S8** (a) The EDS analysis of ZnS: Mn. (b) The element content of S, Zn, Mn. (c)

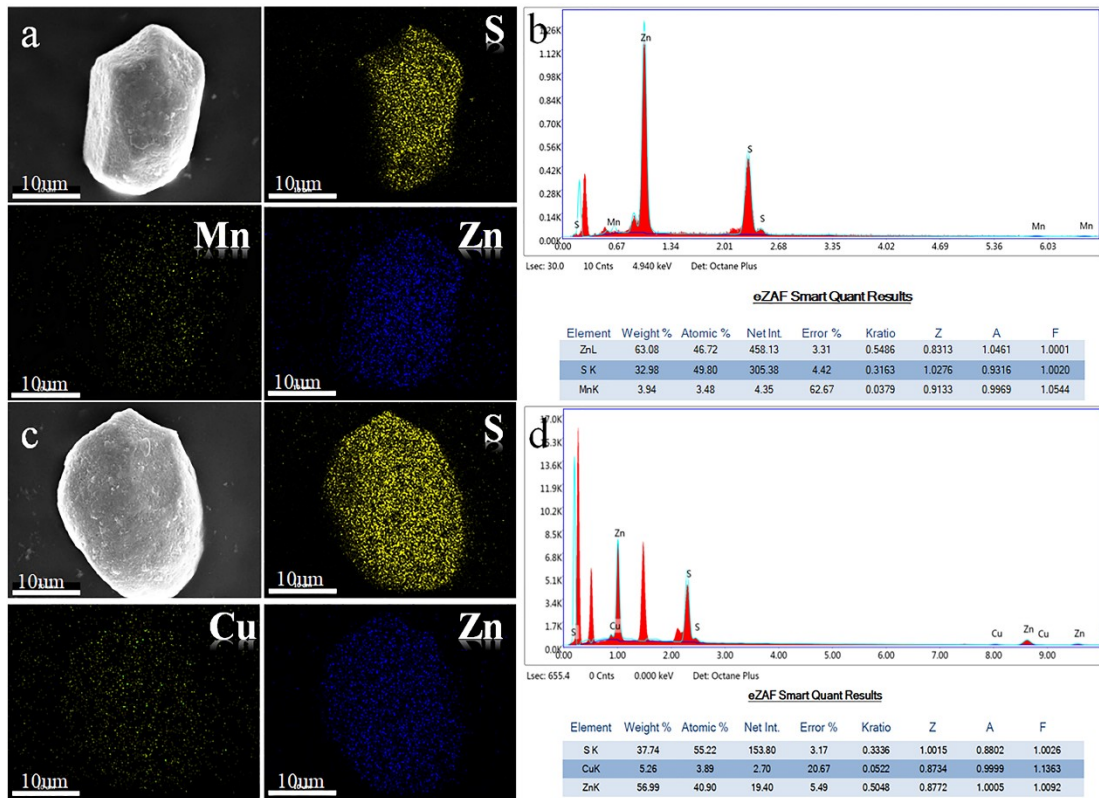

The EDS analysis of ZnS: Cu. (d) The element content of S, Zn, Cu.

**Figure S9** The (a-b) sensitivity and (c) response time of the flexible wearable sensor (Carbon nanotubes ink). The (d-e) sensitivity and (f) response time of the flexible wearable sensor (cZIF-67).

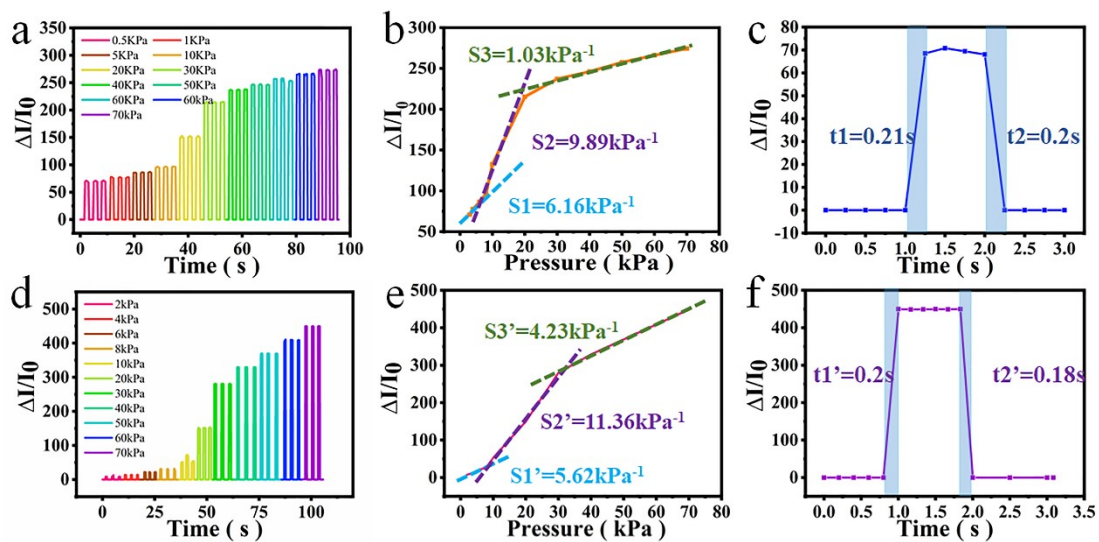

**Figure S10** (a) The digital photo of golden interdigital electrode. (b) The digital photo of PDMS film sprayed with cZIF-67@Cu-CAT nanoparticles. (c) The digital photo of a

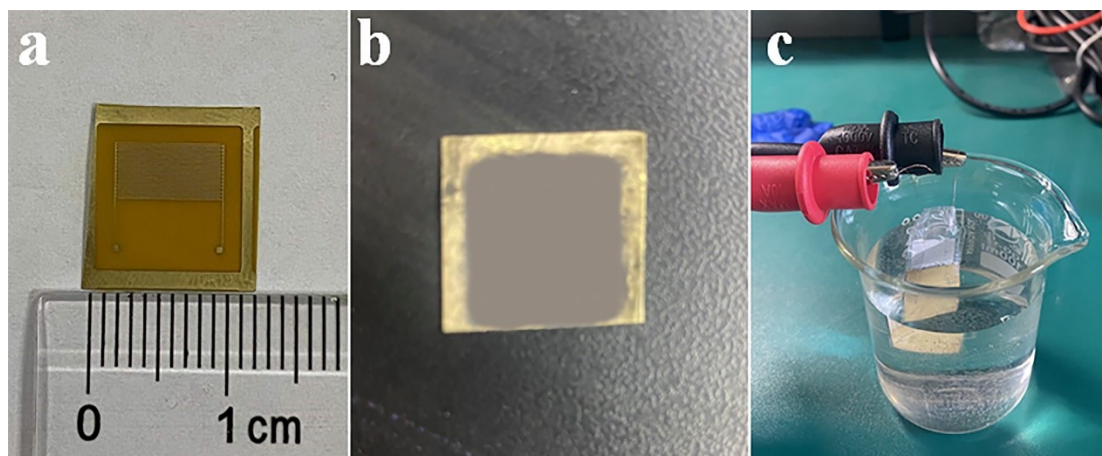

single sensor encapsulated by glue under water.

**Figure S11** Schematic diagram of sensor assembly microstructure design.

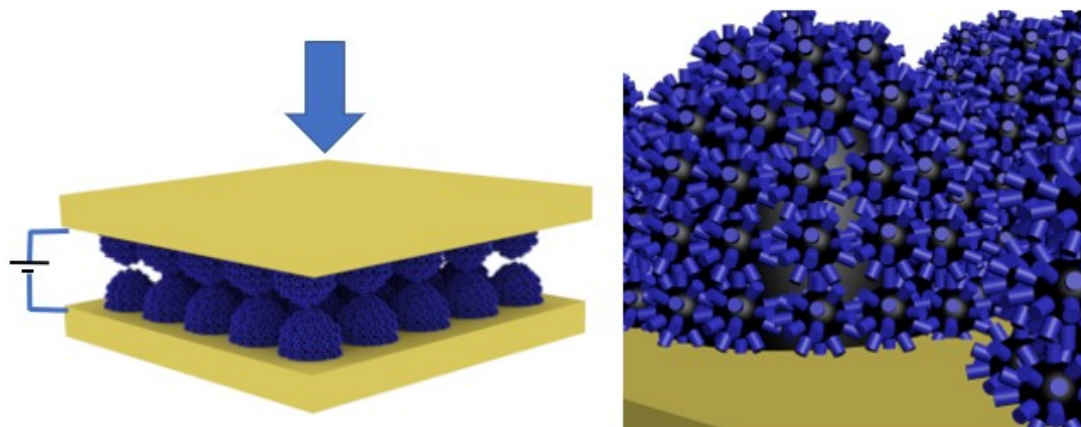

**Figure S12** The adhesion of dandelion-like conductive materials on the microstructural membrane formed by PDMS (a) before and (b) after the long cycle.

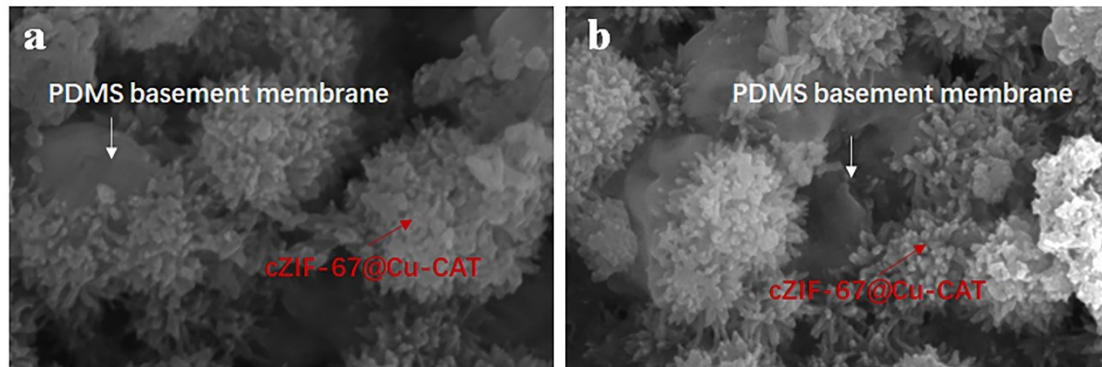

**Figure S13** The sensor's sensing data is transmitted to the phone's computer port in real time via Bluetooth.

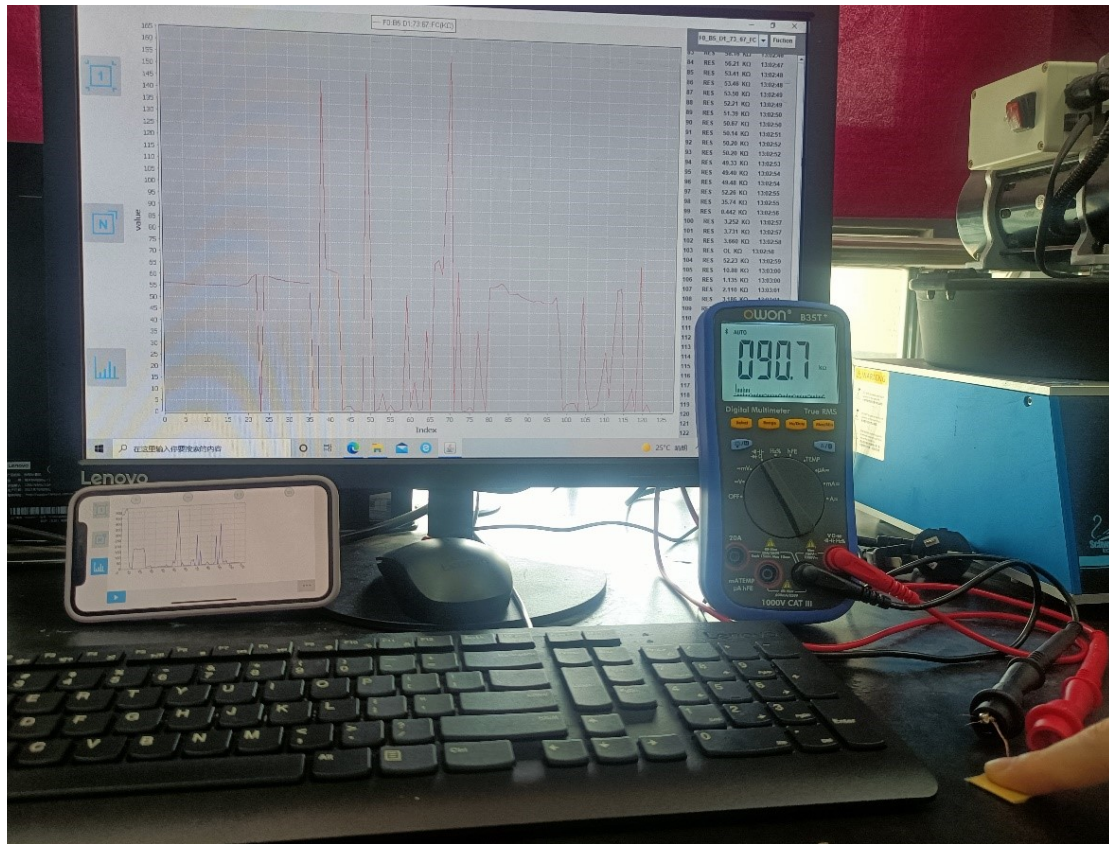

**Table S1** Detailed dimensions of individual sensors

| <b>Unit</b>   | <b>Parameter</b> |       |           |        |
|---------------|------------------|-------|-----------|--------|
| <b>sensor</b> | length           | width | thickness | weight |
|               | 1cm              | 1cm   | 0.32mm    | 0.36g  |



**Table S2**

| Device type                                       | Pressure Sensitivity (kPa <sup>-1</sup> ) | Response time(s) | Stability | Detection limit (Pa) | Ref. |
|---------------------------------------------------|-------------------------------------------|------------------|-----------|----------------------|------|
| All-Textile                                       | 14.4 <sup>-1</sup>                        | 24 ms            | 1000      | 2 Pa                 | 1    |
| MXene/ANFs aerogel                                | 128 kPa <sup>-1</sup>                     | 320 ms           | 1000      | 100 Pa               | 2    |
| Carbon nanotube                                   | 4.4kPa <sup>-1</sup>                      | 10 ms            | 11000     | 0.5 Pa               | 3    |
| Suspended standing nanowire membranes             | 4.26 kPa <sup>-1</sup>                    | --               | --        | 319–1951 Hz          | 4    |
| Flexible tactile sensor                           | 3.26 kPa <sup>-1</sup>                    | --               | --        | --                   | 5    |
| 3D porous crumpled MXene spheres                  | 3.14 kPa <sup>-1</sup>                    | 34 ms            | 5000      | 140 Pa               | 6    |
| Microstructure -bioinspired                       | 53 kPa <sup>-1</sup>                      | 19 ms            | 50000     | 58.4 Pa              | 7    |
| MXene/BP                                          | 77.61 kPa <sup>-1</sup>                   | 10.9 ms          | 10000     | 0.12 kPa             | 8    |
| Carbon materials with arched micro-patterns array | 26.6 kPa <sup>-1</sup>                    | 20 ms            | 5000      | 20 Pa                | 9    |

**Reference**

1. M. Liu, X. Pu, C. Jiang, T. Liu, X. Huang, L. Chen, C. Du, J. Sun, W. Hu and Z. L. Wang, *Adv Mater*, 2017, **29**, 1703700.
2. L. Wang, M. Zhang, B. Yang, J. Tan and X. Ding, *ACS Nano*, 2020, **14**, 10633-10647.

3. H. Xu, Y. Xie, E. Zhu, Y. Liu, Z. Shi, C. Xiong and Q. Yang, *Journal of Materials Chemistry A*, 2020, **8**, 6311-6318.
4. S. Gong, L. W. Yap, Y. Zhu, B. Zhu, Y. Wang, Y. Ling, Y. Zhao, T. An, Y. Lu and W. Cheng, *Advanced Functional Materials*, 2020, **30**, 1910717.
5. Y. Cao, T. Li, Y. Gu, H. Luo, S. Wang and T. Zhang, *Small*, 2018, **14**, e1703902.
6. Z. Yang, S. Lv, Y. Zhang, J. Wang, L. Jiang, X. Jia, C. Wang, X. Yan, P. Sun, Y. Duan, F. Liu and G. Lu, *Nanomicro Lett*, 2022, **14**, 56.
7. T. Yang, W. Deng, X. Chu, X. Wang, Y. Hu, X. Fan, J. Song, Y. Gao, B. Zhang, G. Tian, D. Xiong, S. Zhong, L. Tang, Y. Hu and W. Yang, *ACS Nano*, 2021, **15**, 11555-11563.
8. Y. Zhang, L. Wang, L. Zhao, K. Wang, Y. Zheng, Z. Yuan, D. Wang, X. Fu, G. Shen and W. Han, *Adv Mater*, 2021, **33**, e2007890.
9. M. Zhong, L. Zhang, X. Liu, Y. Zhou, M. Zhang, Y. Wang, L. Yang and D. Wei, *Chemical Engineering Journal*, 2021, **412**, 128649.
